# Supplementary material
Source: PubMed Central journal article supplement (PMC3032071)

American Journal of Human Genetics, Volume 86

## **Supplemental Data**

### **Mechanisms for Nonrecurrent Genomic Rearrangements**

**Associated with CMT1A or HNPP:**

### **Rare CNVs as a Cause for Missing Heritability**

**Feng Zhang, Pavel Seeman, Pengfei Liu, Marian A.J. Weterman, Claudia Gonzaga-Jauregui, Charles F. Towne, Sat Dev Batish, Els De Vriendt, Peter De Jonghe, Bernd Rautenstrauss, Klaus-Henning Krause, Mehrdad Khajavi, Jan Posadka, Antoon Vandenberghe, Francesc Palau, Lionel Van Maldergem, Frank Baas, Vincent Timmerman, and James R. Lupski**

**Figure S1. The breakpoint sequences of nonrecurrent CMT1A or HNPP rearrangements (NCBI build 36).** Microhomologies are shown in red. The insertions are framed. The DNA templates for the SRS event in subject SP951 are highlighted.

**A) Subject A23**  
chr17:15101705-15101764 **TTCATTTACTCAGTTGCCAACTCACCATGCA**AAACCACACGTAATTTCTGGGATGGCTT  
A23 **TTCATTTACTCAGTTGCCAACTCACCATGCA**AGACCAGCCAAATGTAGCTCAGCGGATGC  
chr17:15106879-15106938 **GAGAAACTGGCTCCTCAGCCACTCTGGGA**AGACCAGCCAAATGTAGCTCAGCGGATGC

**B) Subject A26**  
chr17:14553322-14553381 **TAATTATGTCAATGCATCTTGTAGAAAAA**AGTGTTCTGTTACTTCATAATTTGACCTTC  
A26 **TAATTATGTCAATGCATCTTGTAGAAAAA**GATCAAAACAAAAGAGTTGTTATTGAAGCGC  
chr17:15089562-15089621 **CACTAATATATTTTATTGGGTTGTCAAT**GATCAAAACAAAAGAGTTGTTATTGAAGCGC

**C) Subject A29**  
chr17:15096958-15097017 **TCCAGTATTCTGACCCATTCTGCTACACGTC**AGGTCCACACAAATTAACAAAAAGCAGG  
A29 **TCCAGTATTCTGACCCATTCTGCTACACGTC**CCCGAGTCTGGAGAGACCTGCAGAATTTGG  
chr17:15110257-15110316 **GGCATAAAGACTTCCTCTTGTGTTAGGGA**TCCCGAGTCTGGAGAGACCTGCAGAATTTGG

**D) Subjects C1292 and C2405**  
chr17:14215217-14215276 **GTGATCTGCCTGCCTT**AGCCTCCCAAAGTGCTGGGATTACAGGGGTGAGCCACCGCACCTT  
C1292/C2405 **GTGATCTGCCCGCCTT**AGCCTCCCAAAGTGCTGGGATTACAGGCATGAGCCACTGCGCCC  
chr17:15509333-15509274 **GTGATCTGCCCGCCTC**AGCCTCCCAAAGTGCTGGGATTACAGGCATGAGCCACTGCGCCC  
AluY:AluY \*\*\*\*\* \*\* \* \*\*\*\*\*  
chr17:14534640-14534581 **CTCATTCTGAGGGCAGCATTAAC**TAAATACCAAAGCCAAAGATACAAGAAGATAAAAT  
C1292/C2405 **CTCATTCTGAGGGCAGC**TTTGATCCATTTTGAGTTACAGCTCACACCACTGTGTACAG  
chr17:14886192-14886251 **TCCCGAGTCCACCGGCTAGGGAGCTGGAAT**TCTGTTCTCACACCACTGTGTACAG

**E) Subject C3011**  
chr17:17856598-17856657 **ATAGTCCAGCTACTCAGGA**TGCTGAGGTGGGAGGATGGCTTGAGCCAGGAGGTGGAGG  
C3011 **ATAGTCCAGCTACTCAGGA**GACCGAGGCAGGAGAATGGCCACAAACATGGCAGTTCTT  
chr17:17730614-17730673 **CTAAAAACAGTTT**CAACGCCCACTGTCGGAGGCTGGGAAAAAACACATGGCAGTTCTT

**F) Subjects C3159 and C4316**  
chr17:16072633-16072692 **TAGCCAGGATGGTCTCGA**TCTCCTGACCTCGTGATCCGCCCGCCTTGGCCTCCCAAAGTG  
C3159/C4316 **TAGCCAGGATGGTCTCGA**TCTCCTGACCTCGTGATCCGCCCGCCTTGGCCTCCCAAAGTG  
chr17:15025026-15025085 **TAGCCAGGATGGTCTCA**ATCTCCTGACCTCGTGATCCGCCCGCCTTGGCCTCCCAAAGTG  
AluY:AluY \*\*\*\*\* \*\*\*\*\* \*\* \*

**G) Subject SP54C**  
chr17:15468600-15468659 **TTTTTCTATTTTCAGTAGAGATGGA**GTTTACCATGTTGGTCAGGCTGCTCTCGAACTCC  
SP54C **TTTTTCTATTTTCAGTAGAGATGGA**GTTTACCATATTTGGCCAGGCTGATCTCGAACTCC  
chr17:15057050-15057109 **TTTTTGTATTTT**TAGTAGACGAGGTTTACCATATTGGCCAGGCTGATCTCGAACTCC  
AluSg:AluSg \*\*\*\*\* \* \*\*\*\*\*

**H) Subject SP951**  
chr17:15328198-15328257 **ATGAGTGACTATTATGTGCCAGGCACCATACTAGTAGCTAGAAATAAAACATATAATGAT**  
SP951 **ATGAGTGACTATTATGTGCC**TAAAATTATCTTTAGTCATTAAATTTAGTCATTATTTAT  
chr17:14890718-14890777 **TAATAGTGAATAGAATTTCTT**TAAAATTATCTTTAGTCATTAAATTTAATCTTACTTCA  
chr17:14890706-14890765 **GTATTTTAACTTAATAGTGAATAGAATTTCTT**TAAAATTATCTTTAGTCATTAAATTTAT

**I) Subjects SP3672 and SP3840**  
chr17:15329758-15329817 **GGCCAGGCTAGTTTCCA**ACTCCTGACCTCAAGTGCTCCGCCACCTAGGCCTCCCAAAGT  
SD11/SD14 **GGCCAGGCTAGTTTCCA**ACTCCTGACCTCAGGATGGTAGTTAAGAGCTCACATCCTAGTA  
chr17:15143634-15143693 **AAAAAAAAAAAAAAAAAAAAA**ACAGTATAGGATGGTAGTTAAGAGCTCACATCCTAGTA

**J) Subject SPR1**  
chr17:15311588-15311647 **GTGCTCTCAATCCCACTTCTCTTGGC**TCTCTTTTGCTGCAGCTAACCATCCTCTTGCC  
SPR1 **GTGCTCTCAATCCCACTTCTCTTGGC**TCTCTAAAGGAGGAGAGTGGTTAAGGCCAGAGA  
chr17:15118163-15118222 **TGGACTGTAATAGTTGGCTCAGTTTCA**TCTCTAAAGGAGGAGAGTGGTTAAGGCCAGAGA

**K) Subject SPR2**  
chr17:15079005-15079064 **TGCTCCAAGGCACCCCACTAATTTTT**AAATCATTFTTTGTAGAGATGGCATCTCGCTTG  
SPR2 **TGCTCCAAGGCACCCCACTAATTTTT**CATTTGCTGAGACTGGCAAGATTTAGTTTCTCTAA  
chr17:15096316-15096375 **GGAGACCACCAAGGGCTCAGTTGGGGC**TGCTGAGACTGGCAAGATTTAGTTTCTCTAA

**Figure S2. The conservation tracks of the duplicated upstream regions of *PMP22* in the human UCSC Genome Browser.** *Above*, the user tracks show the duplication regions in subjects SPR1, SD11, and SD14, which involved the upstream of the *PMP22* gene. *Middle*, plots of conservation scores and sequence alignments of available vertebrate genomes. The red arrows show the most conserved noncoding sequences (CNS) with log-odds scores of >100 within the overlapped duplication region. *Bottom*, the 28-way “PhastCons Placental Mammal Conserved Elements” track shows predicted conserved elements and log-odds scores.

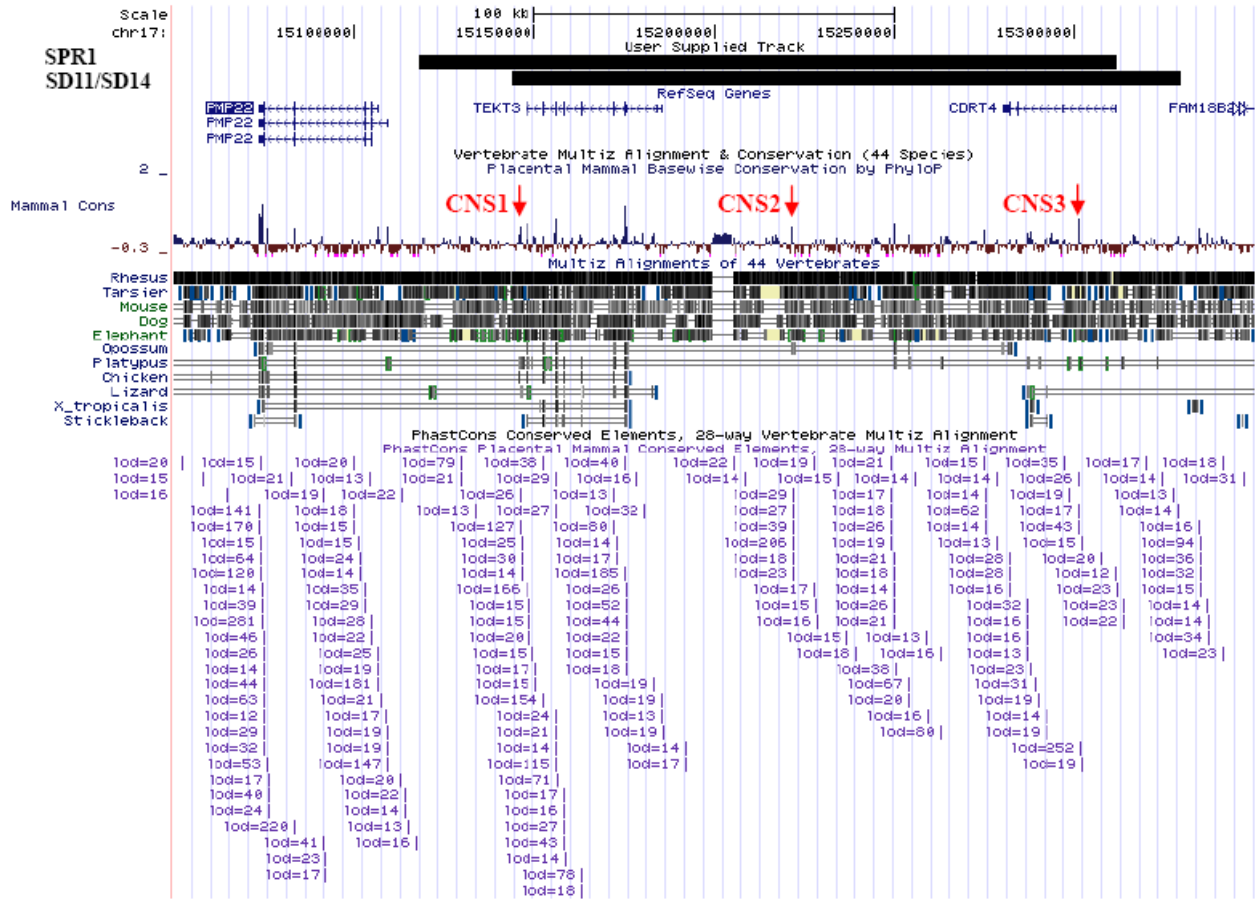

**Figure S3. The UCSC Genome Browser tracks of conserved transcription factor binding sites within the highly conserved noncoding sequences (CNS 1-3) upstream of *PMP22*.**

**CNS1**

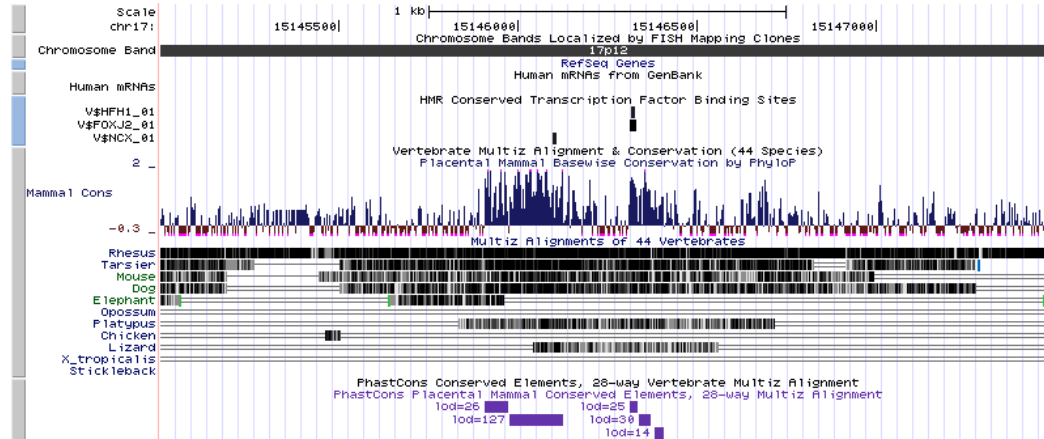

**CNS2**

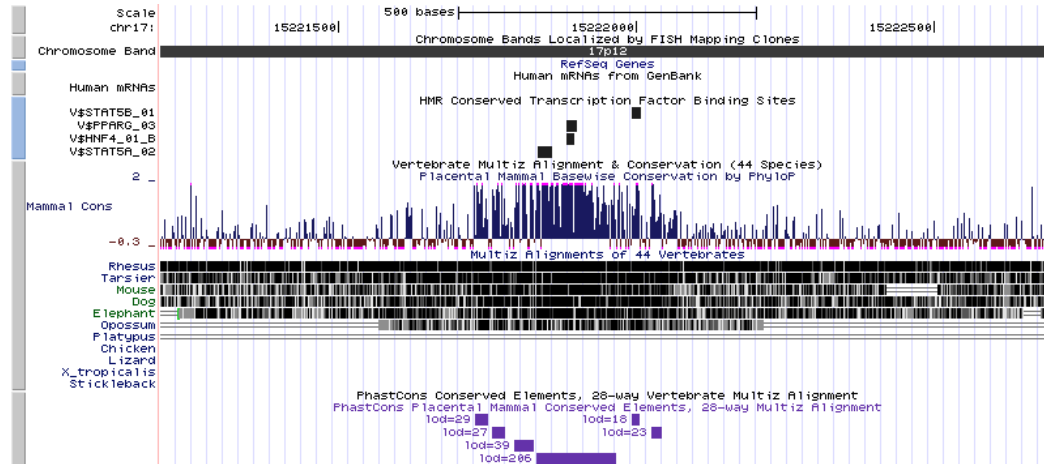

**CNS3**

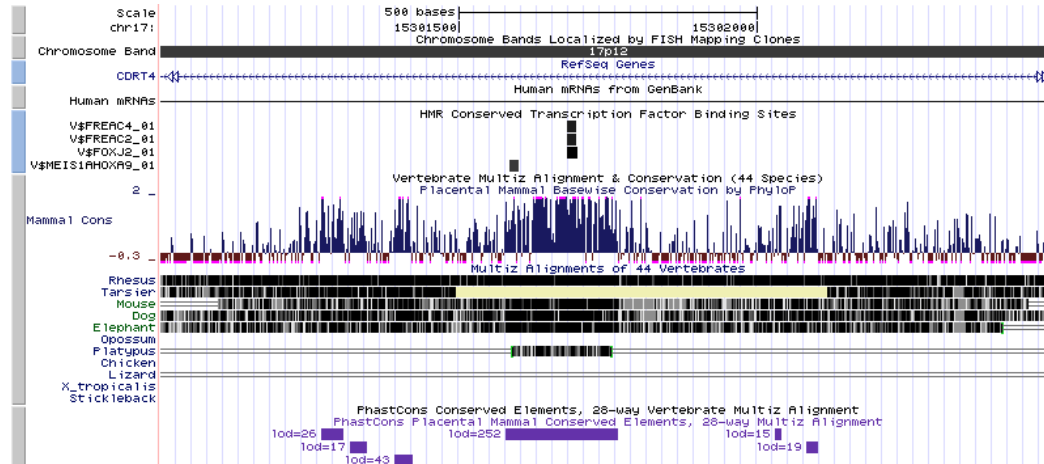

Supplement: mmc1.pdf [file mmc1.pdf]
